# Supplementary material
Source: PubMed Central journal article supplement (PMC5192697)

**Biophysical Journal, Volume 111**

**Supplemental Information**

**SF1 Phosphorylation Enhances Specific Binding to U2AF<sup>65</sup> and Reduces Binding to 3'-Splice-Site RNA**

**Rakesh Chatrikhi, Wenhua Wang, Ankit Gupta, Sarah Loerch, Alexandre Maucuer, and Clara L. Kielkopf**

## Supplementary Tables

**Table S1.** Thermodynamics of SF1 binding U2AF<sup>65</sup> proteins in different ionic strengths.<sup>a</sup>

| <b>Interaction:</b>                                                                       | <b>K<sub>D</sub></b><br>(nM) | <b>ΔG<sup>b</sup></b><br>(kcal mol <sup>-1</sup> ) | <b>ΔH</b><br>(kcal mol <sup>-1</sup> ) | <b>-TΔS<sup>c</sup></b><br>(kcal mol <sup>-1</sup> ) | <b>n<sup>d</sup></b> |
|-------------------------------------------------------------------------------------------|------------------------------|----------------------------------------------------|----------------------------------------|------------------------------------------------------|----------------------|
| <b>U2AF<sup>65</sup><sub>R12U</sub> in 100 mM NaCl buffer titrated into: <sup>e</sup></b> |                              |                                                    |                                        |                                                      |                      |
| SF1 <sub>1-255</sub>                                                                      | 60 ± 5                       | -10.1 ± 0.1                                        | -13.5 ± 0.5                            | 3.5 ± 0.1                                            | 1.0 ± 0.1            |
| Phospho-SF1 <sub>1-255</sub>                                                              | 40 ± 12                      | -10.3 ± 0.2                                        | -14.5 ± 0.2                            | 4.2 ± 0.1                                            | 0.9 ± 0.1            |
| <b>U2AF<sup>65</sup> UHM in 100 mM NaCl buffer titrated into: <sup>f,g</sup></b>          |                              |                                                    |                                        |                                                      |                      |
| SF1 <sub>14-132</sub>                                                                     | 43 ± 1                       | -10.2 ± 0.1                                        | -13.5 ± 0.1                            | 3.3 ± 0.1                                            | 1.0 ± 0.1            |
| Phospho-SF1 <sub>14-132</sub>                                                             | 24 ± 1                       | -10.6 ± 0.1                                        | -20.6 ± 0.1                            | 10.0 ± 0.1                                           | 0.9 ± 0.1            |
| <b>U2AF<sup>65</sup> UHM in 250 mM NaCl buffer titrated into: <sup>f</sup></b>            |                              |                                                    |                                        |                                                      |                      |
| SF1 <sub>14-132</sub>                                                                     | 940 ± 47                     | -8.4 ± 0.1                                         | -13.5 ± 0.5                            | 5.1 ± 0.5                                            | 0.9 ± 0.1            |
| Phospho-SF1 <sub>14-132</sub>                                                             | 623 ± 20                     | -8.6 ± 0.1                                         | -14.5 ± 0.1                            | 5.8 ± 0.1                                            | 1.0 ± 0.1            |

<sup>a</sup> Average values and standard deviations of at least two independent titrations.

<sup>b</sup> Calculated using the equation  $\Delta G = -RT \ln (K_D^{-1})$  at T=303 K.

<sup>c</sup> Calculated using the equation  $-T\Delta S = \Delta G - \Delta H$ .

<sup>d</sup> Apparent stoichiometry of U2AF<sup>65</sup>:SF1 proteins (n).

<sup>e</sup>  $c = [M]/K_D$  where [M] is the concentration of macromolecule in the sample cell.

<sup>f</sup> 100 mM NaCl and 250 mM NaCl buffers include 25 mM HEPES pH 7.4, 0.2 mM TCEP.

<sup>g</sup> Also shown for comparison in Table 1.

## Supplementary Figures

**Figure S1.** Control titrations of proteins or RNA into buffer, including (A) SPF45 UHM (200  $\mu\text{M}$ ), (B) U2AF<sup>35</sup> UHM (200  $\mu\text{M}$ ), (C) 35  $\mu\text{M}$  B3P3 RNA, or (D) 35  $\mu\text{M}$  SF1<sub>1-255</sub> – U2AF<sup>65</sup><sub>R12U</sub> complex. The control titration of CAPER $\alpha$  UHM into buffer is shown in Loerch *et al.* (2014) *J. Biol. Chem.* 289:17325-17337.

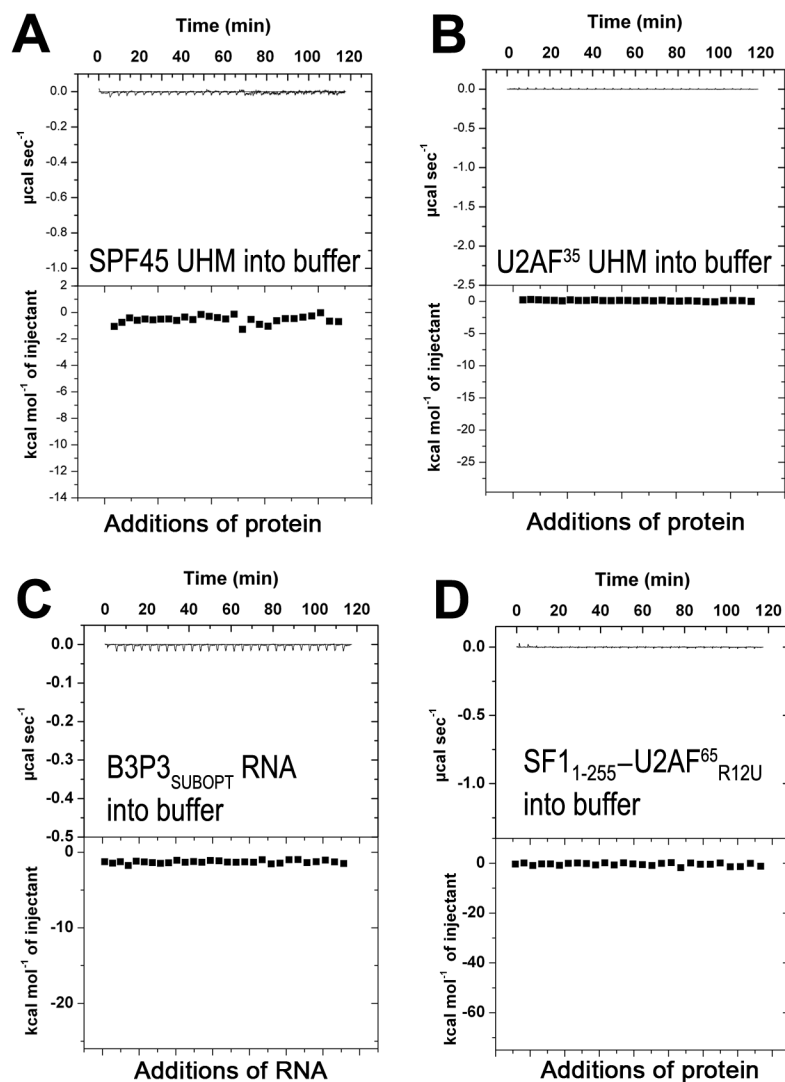

**Figure S2.** Representative isotherms of SF1 or phospho-SF1 titrated with U2AF<sup>65</sup> constructs and fit with identical sites binding models. The buffer in (A-B) is 100 mM NaCl, 25 mM HEPES pH 7.4, 0.2 mM TCEP. The titrations include (A) 48  $\mu$ M U2AF<sup>65</sup><sub>R12U</sub> into 6  $\mu$ M SF1<sub>1-255</sub>, c=100. (B) 32  $\mu$ M U2AF<sup>65</sup><sub>R12U</sub> into 4  $\mu$ M phospho-SF1<sub>1-255</sub>, c=100. The buffer in (C-D) is 250 mM NaCl, 25 mM HEPES pH 7.4, 0.2 mM TCEP. The titrations include (C) 120  $\mu$ M U2AF<sup>65</sup> UHM into 15  $\mu$ M SF1<sub>14-132</sub>, c=16. (D) 120  $\mu$ M U2AF<sup>65</sup> UHM into 15  $\mu$ M phospho-SF1<sub>14-132</sub>, c=24. The apparent equilibrium dissociation constants ( $K_D$ ) and standard deviations between two titrations are given.

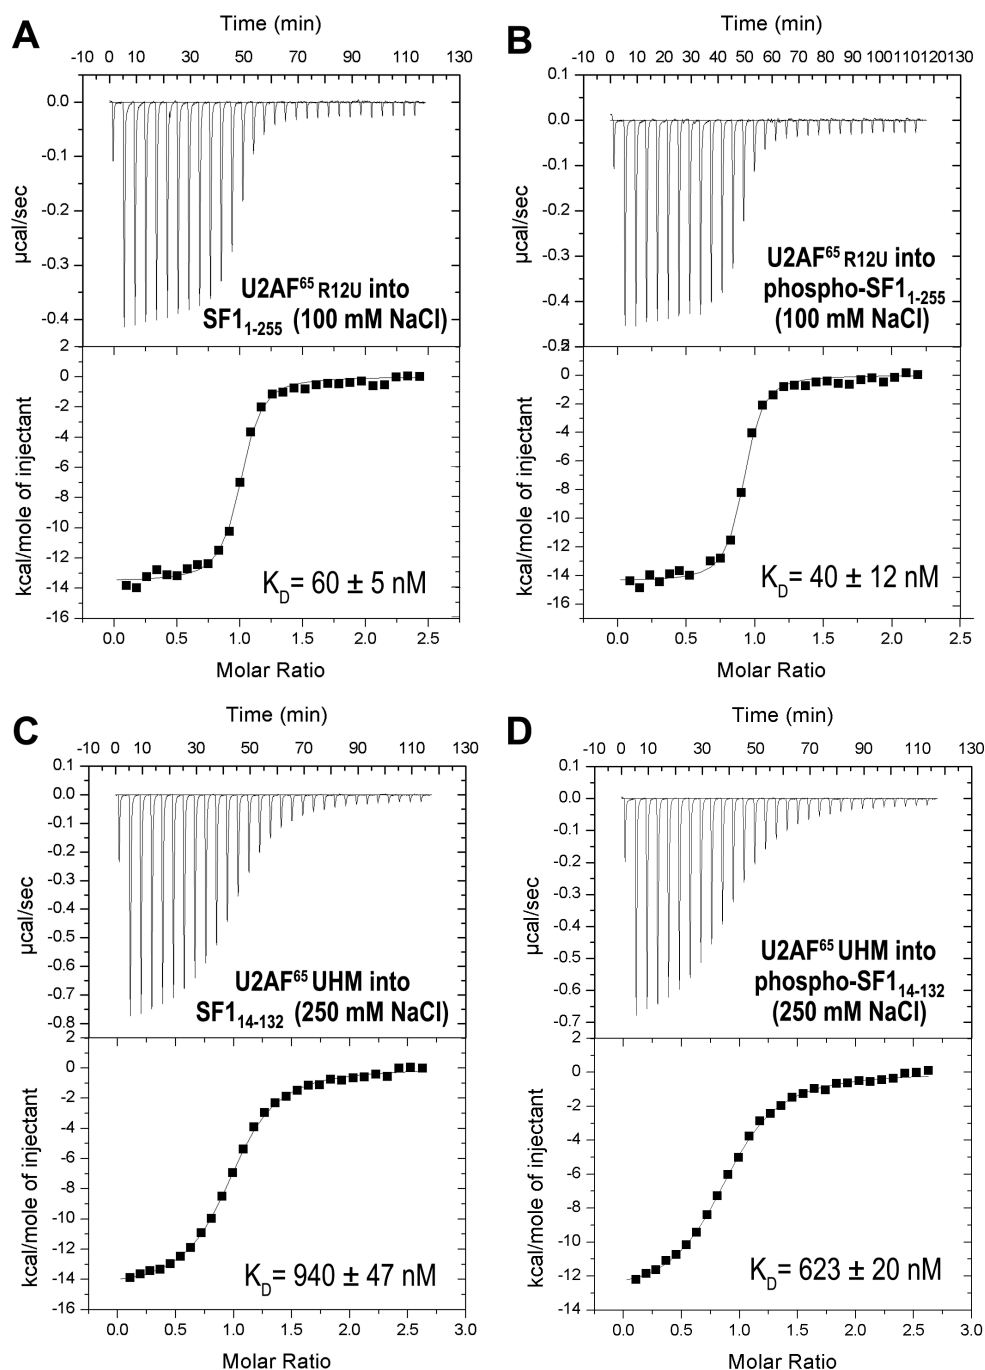

**Figure S3.** Schematic diagram of binding events during the titration of SF1<sub>1-255</sub> or phospho-SF1<sub>1-255</sub> into a mixture of U2AF<sup>65</sup> (or U2AF<sup>65</sup>-U2AF<sup>35</sup> UHM complex) and fluorescein-labeled AdML RNA, for which apparent  $K_D$ 's are given in Figure 3. A dashed line separates the titrated SF1<sub>1-255</sub> or phospho-SF1<sub>1-255</sub> proteins from the mixture in the cuvette. Based on the  $\sim 30$  nM  $K_D$  of the full length U2AF<sup>65</sup>-U2AF<sup>35</sup> UHM complex binding the AdML Py tract (56) and a 25 nM concentration of U2AF<sup>65</sup>-U2AF<sup>35</sup> UHM protein and RNA in the sample cell, approximately 8 nM U2AF<sup>65</sup>-U2AF<sup>35</sup> UHM-RNA complex and 17 nM free U2AF<sup>65</sup>-U2AF<sup>35</sup> UHM protein and RNA are present in the sample cell at the start of the titration. The  $K_D$ 's of other binding reactions are not known for the current constructs, RNA sequence, ionic strength, and pH.

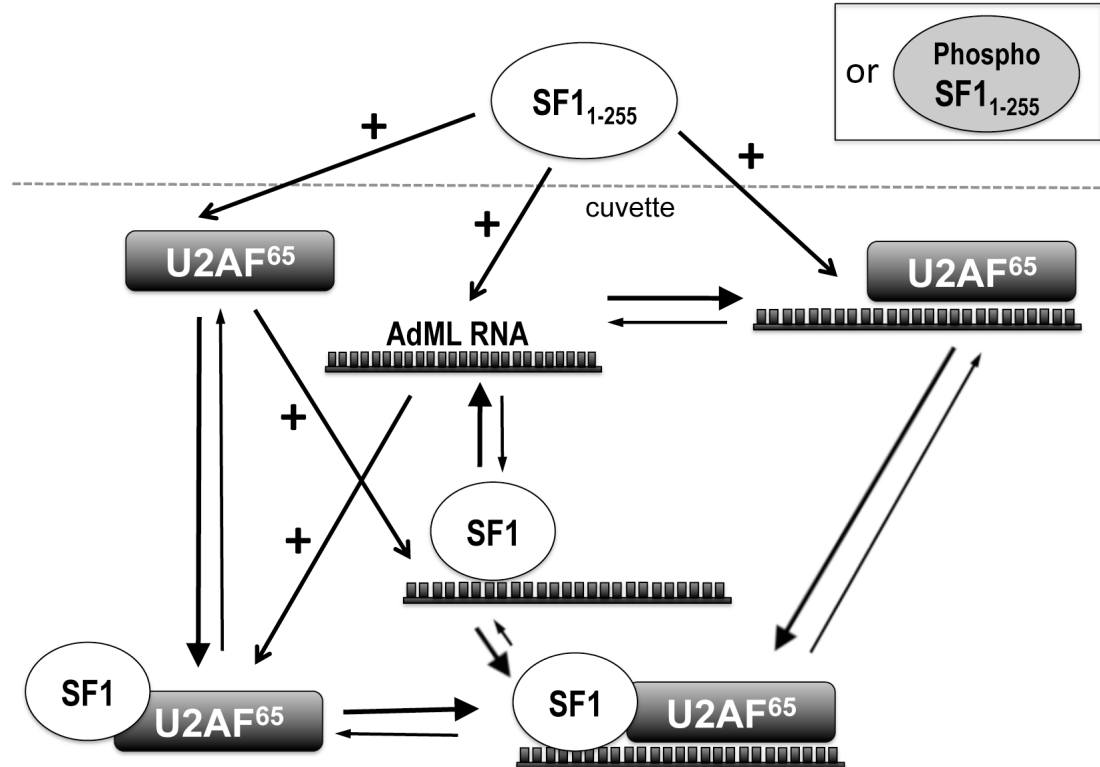

**Figure S4.** Representative isotherm showing 100  $\mu\text{M}$  B3P3 RNA titrated into 5  $\mu\text{M}$  U2AF<sup>65</sup><sub>R12U</sub> ( $c=10$ ) and fit with an identical sites binding model. The apparent equilibrium dissociation constant ( $K_D$ ) and standard deviation between two titrations is given.

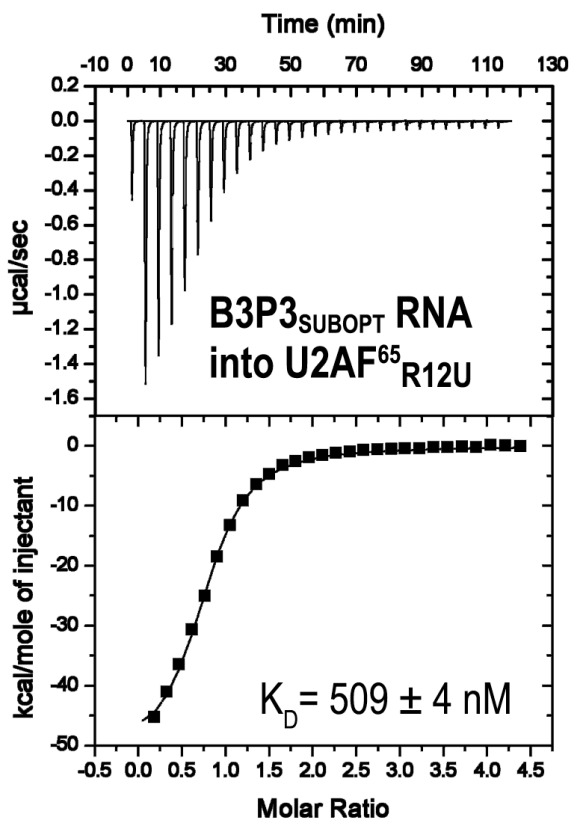

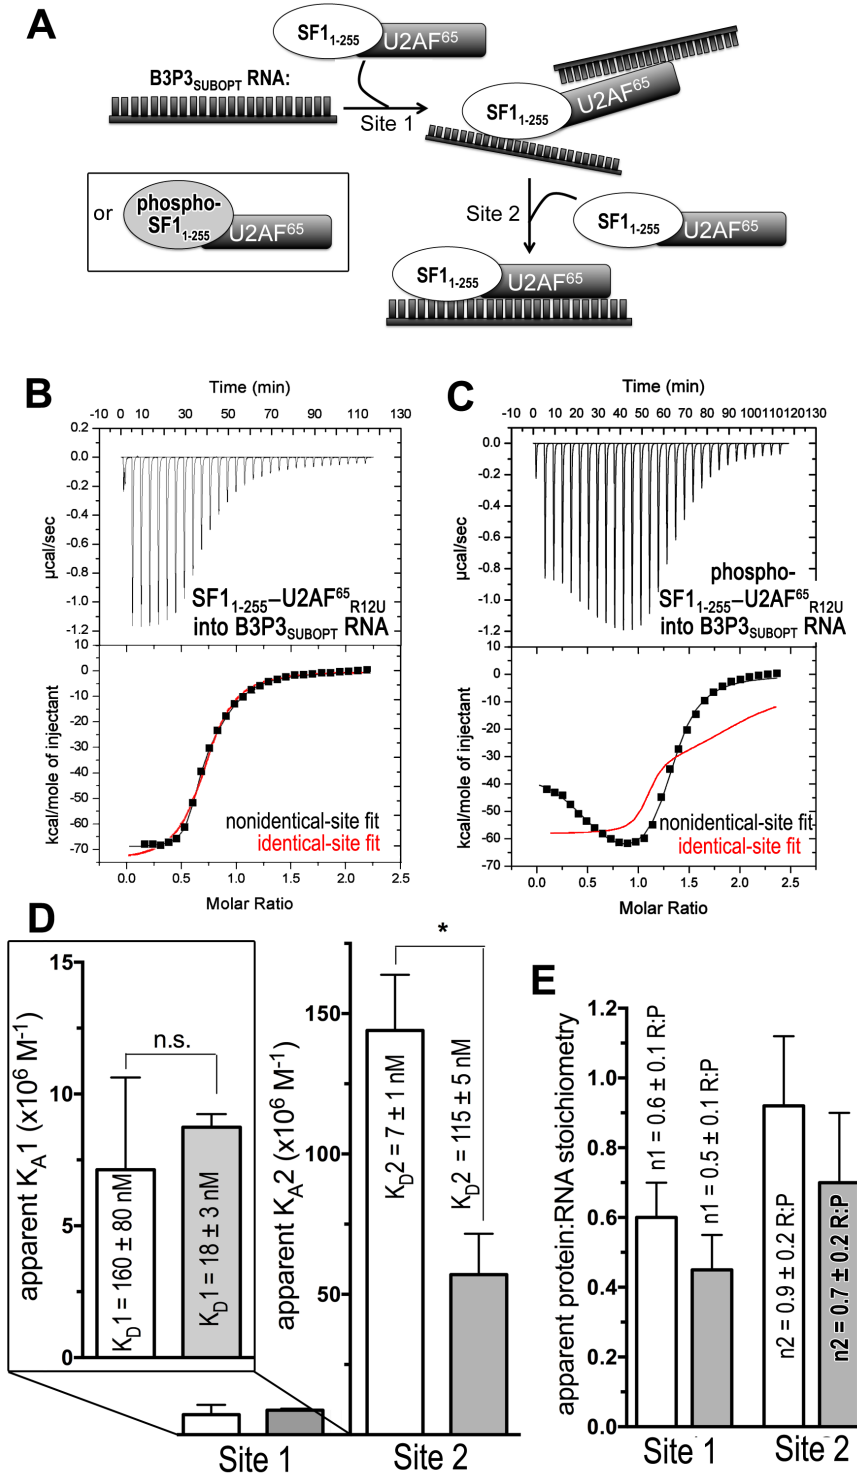

**Figure S5.** ITC results for SF1<sub>1-255</sub> – U2AF<sup>65</sup><sub>R12U</sub> or phospho-SF1<sub>1-255</sub> – U2AF<sup>65</sup><sub>R12U</sub> reverse titrated into B3P3 RNA. (A) Schematic diagram of the ITC experiment. (B–C) Representative isotherms fit with binding models for either nonidentical sites (black lines) or identical sites (red lines). (B) 35 μM SF1<sub>1-255</sub> – U2AF<sup>65</sup><sub>R12U</sub> complex into 5 μM B3P3 RNA (nonidentical site  $\chi^2 = 0.30E6 \pm 0.20E6$ ; identical sites  $\chi^2 = 1.88E6 \pm 0.69E6$ ),  $c=31$  for site 1 and  $c=714$  for site 2. (C) 50 μM phospho-SF1<sub>1-255</sub> – U2AF<sup>65</sup><sub>R12U</sub> complex into 5 μM B3P3 RNA (nonidentical sites ( $\chi^2 = 1.45E6 \pm 0.14E6$ ; identical sites  $\chi^2 = 82.3E6 \pm 76.0E6$ ),  $c=43$  for site 1 and  $c=278$  for site 2. The identical site models were discarded based on the large  $\chi^2$  increase and poor fit. (D) Bar graph of apparent affinities ( $K_A$ ) of the interactions, colored as shown in (A). The apparent equilibrium dissociation constants ( $K_D$ ) are given. An expanded view of the lower affinity sites is inset to the left. (E) Bar graph of apparent protein:RNA stoichiometries ( $n$ ), colored as for (A).

**Figure S6.** Representative isotherm showing 50  $\mu\text{M}$  B3P3<sub>SUBOPT</sub> RNA titrated into 5  $\mu\text{M}$  SF1mut-U2AF<sup>65</sup><sub>R12U</sub> in 100 mM NaCl, 25 mM sodium phosphate pH 7.4. The isotherm was fit using an identical sites binding model. The apparent equilibrium dissociation constant ( $K_D$ ) and standard deviation of two independent titrations is inset.

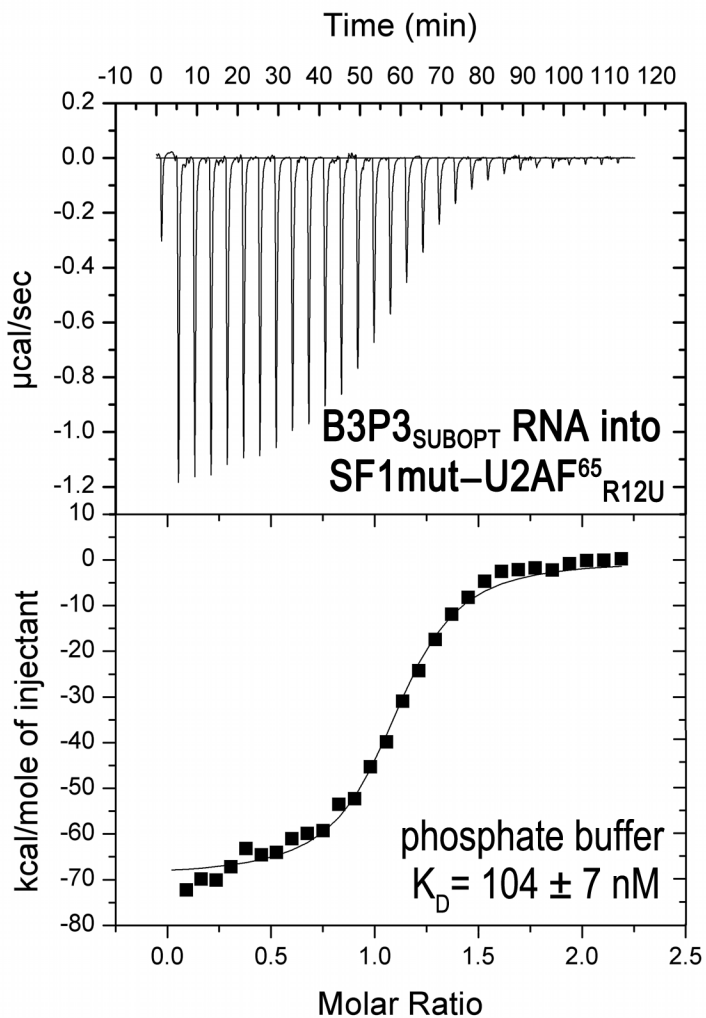

Supplement: mmc1.pdf [file mmc1.pdf]
